# Supplementary material for: Sexually attractive males produce relatively more sons in a fish with external fertilisation
Source: Research Square preprint supplement (doi:10.21203/rs.3.rs-7251518/v1), 2025-08-11
Supplement: Supplementary file 1 [file 6097007846f07c007fdaa1b1.xlsx]

## Sheet: information
Sexually attractive males produce relatively more sons in a fish with external fertilisation
Theo C. M. Bakker1,§, Björn Müller1,2, Marion Mehlis-Rick1,2
1Bonn Institute for Organismic Biology (BIOB), Department of Animal Biodiversity, University of Bonn, An der Immenburg 1, 53121 Bonn, Germany
2Fertility centre Bonner Bogen, Joseph-Schumpeter-Allee 1, 53227 Bonn, Germany

## Sheet: Table S1
		Table S1 Model summary Table of linear model for the effects of father traits (red chromaticity,
			body size, body condition, GSI, sperm head-to-tail-length ratio, sperm midpiece volume),
			mother traits (body condition, mass of egg, number of eggs) and offspring traits
			(% mortality in first three weeks) on sex ratio of offspring
			lm(sex.ratio ~ body.condition.mo + chromaticity + body.condition.fa + GSI + headtotail.ratio +
			body.size.fa + mass.10.eggs + midpiece.volume + number.of.eggs + %.mort)
			Multiple R2=0.3322, Adjusted R2=0.04192, F10,23=1.144, p=0.374
		Dependent variable	Explanatory variable	estimate	SE	t	p
		sex ratio	(intercept)	0.712307	0.572573	1.244	0.226
			body condition mother	0.168057	0.190691	0.881	0.3873
			chromaticity1	-8.244e-05	3.878e-05	-2.126	0.0445 *
			body condition father	-0.118797	0.2129	-0.558	0.5822
			GSI2	-0.0867316	0.149578	-0.58	0.5677
			sperm head-to-tail-length ratio	2.914	2.57018	1.134	0.2686
			body size father	-0.0281022	0.0640665	-0.439	0.665
			mass of egg	-9.11038	9.08315	-1.003	0.3263
			sperm midpiece volume	-0.257838	0.580119	-0.444	0.6609
			number of eggs	-0.00021189	0.00039097	-0.542	0.5931
			% mortality in first 3 weeks1	0.0922831	0.151131	0.611	0.5474
		1Box-Cox transformed, 2gonadosomatic index, *p<0.05
